# Supplementary material for: Inherited human c-Rel deficiency disrupts myeloid and lymphoid immunity to multiple infectious agents
Source: JCI journal article supplement (doi:10.1172/jci150143), 2021-08-31
Supplement: sd2 [file 2]

|                | Patient             | Controls            |
|----------------|---------------------|---------------------|
|                | cpm/10 <sup>3</sup> | cpm/10 <sup>3</sup> |
| Medium         | 0.75                | 0                   |
| Tuberculin     | 7.4                 | >10.75              |
| Candidin       | 1.65                | >10.75              |
| CMV            | 1.5                 | >10.75              |
| Tetanus toxoid | 1.7                 | >10.75              |

Supplemental Table 1: T-cell proliferation measured on day 6. Proliferation was evaluated by assessing thymidine incorporation. Cpm: counts per minute. CMV: cytomegalovirus.
